# Supplementary material for: Live-cell multiphoton fluorescence correlation spectroscopy with an improved large Stokes shift fluorescent protein
Source: PubMed Central journal article supplement — Mol Biol Cell. 2015 Jun 1;26(11):2054–66. doi: 10.1091/mbc.E14-10-1473 (PMC4472016; doi:10.1091/mbc.e14-10-1473), 2015-06-01

# Supplemental Materials

*Molecular Biology of the Cell*

Guan et al.

# Supporting Information

## Live Cell Multi-Photon Fluorescence Correlation Spectroscopy with an Improved Large Stokes Shift Fluorescent Protein

Yinghua Guan<sup>a,b</sup>, Matthias Meurer<sup>c</sup>, Sarada Raghavan<sup>c,\*</sup>, Aleksander Rebane<sup>d</sup>, Jake R. Lindquist<sup>e</sup>, Sofia Santos<sup>f,i</sup>, Iliia Kats<sup>c</sup>, Michael W. Davidson<sup>h</sup>, Ralph Mazitschek<sup>f,g</sup>, Thomas E Hughes<sup>e</sup>, Mikhail Drobizhev<sup>d</sup>, Michael Knop<sup>c,1</sup>, Jagesh V. Shah<sup>a,b,1</sup>

<sup>a</sup> Department of Systems Biology, Harvard Medical School, Boston, MA 02115, USA.

<sup>b</sup> Renal Division, Brigham and Women's Hospital, Boston, MA 02115, USA.

<sup>c</sup> Zentrum für Molekulare Biologie der Universität Heidelberg (ZMBH) and Deutsches Krebsforschungszentrum (DKFZ), DKFZ-ZMBH-Allianz, Im Neuenheimer Feld 282, 69120 Heidelberg, Germany

<sup>d</sup> Department of Physics, Montana State University, Bozeman, MT 59717, USA.

<sup>e</sup> Department of Cell Biology and Neuroscience, Montana State University, Bozeman, MT 59717, USA.

<sup>f</sup> Center for Systems Biology, Massachusetts General Hospital, 185 Cambridge Street, Boston, MA 02114, USA

<sup>g</sup> Broad Institute of Harvard and MIT, Cambridge, MA 02142, USA

<sup>h</sup> National High Magnetic Field Laboratory, Florida State University, Tallahassee, FL 32310, USA

<sup>i</sup> Instituto de Investigação do Medicamento, Faculdade de Farmácia, Universidade de Lisboa, Lisbon 1640-003, Portugal.

\* current address: Biomedical Sciences Institute (BMSI), A\*STAR - Agency for Science, Technology and Research, Singapore

### <sup>1</sup>Corresponding Authors

Jagesh@hms.harvard.edu or m.knop@zmbh.uni-heidelberg.de

| <b>Table of Contents</b>                                 |                | <b>Pages</b> |
|----------------------------------------------------------|----------------|--------------|
| <i>mKeima Plasimids</i>                                  | (Table S1, S2) | S2           |
| <i>FCS and FCCS Plasimids</i>                            | (Table S3)     | S3           |
| <i>PCR primers for FCS and FCCS Plasimids</i>            | (Table S4)     | S4           |
| <i>Drug Synthesis Methods</i>                            | (Figure S1)    | S5           |
| <i>mKeima Brightness Comparison in vivo and in vitro</i> | (Figure S2)    | S6           |
| <i>pKa-value of mKeima and variants</i>                  | (Figure S3)    | S7           |
| <i>TFP Brightness Comparison in vivo and in vitro</i>    | (Figure S4)    | S7           |
| <i>hmKeima8.5 photophysics in live cell</i>              | (Figure S5)    | S8           |

## mKeima Plasmids

**Table S1** – Plasmids used for mKeima variants in this study

| Name                     | Backbone                         | Insert      | Reference         |
|--------------------------|----------------------------------|-------------|-------------------|
| pRS415-P <sub>Gal1</sub> | CEN-ARS, LEU2                    | no          | Ref <sup>1</sup>  |
| pRSET                    | P <sub>T7</sub> , 6xHis, EK-site |             | Life Technologies |
| (YMaM679)*               | pRS415-P <sub>Gal1</sub>         | mKeima      | this study        |
| (YMaM680)*               | pRS415-P <sub>Gal1</sub>         | mKeima4.15  | this study        |
| (YMaM681)*               | pRS415-P <sub>Gal1</sub>         | mKeima8.5   | this study        |
| pJag795                  | pRSET-C                          | hmKeima     | this study        |
| pJag797                  | pRSET-A                          | hmKeima4.15 | this study        |
| pMaM329                  | pRSET-A                          | hmKeima8.5  | this study        |

\*Plasmids were constructed by homologous recombination of a PCR product with a gapped plasmid directly in yeast

**Table S2** – Yeast strains used in this study

| Name     | Strain background | Genotype/Plasmid                     | Reference        |
|----------|-------------------|--------------------------------------|------------------|
| ESM356-1 | FY1679            | MATa ura3-52 leu2Δ1 his3Δ200 trp1Δ63 | Ref <sup>2</sup> |
| EMS356-1 | FY1679            | pRS415-P <sub>Gal1</sub>             | this study       |
| YMaM679  | ESM356-1          | pRS415-P <sub>Gal1</sub> -mKeima     | this study       |
| YMaM680  | ESM356-1          | pRS415-P <sub>Gal1</sub> -mKeima4.15 | this study       |
| YMaM681  | ESM356-1          | pRS415-P <sub>Gal1</sub> -mKeima8.5  | this study       |

1. Mumberg, D., Müller, R. & Funk, M. Yeast vectors for the controlled expression of heterologous proteins in different genetic backgrounds. *Gene* **156**, 119–122 (1995).
2. Rogowska-Wrzesinska, A. *et al.* Comparison of the proteomes of three yeast wild type strains: CEN.PK2, FY1679 and W303. *Comp. Funct. Genomics* **2**, 207–225 (2001).

## FCS and FCCS Plasmids

**Table S3. All plasmids used in FCS/FCCS measurement:**

| Number  | Backbone        | Expression                                    | Bacterial Resistance |
|---------|-----------------|-----------------------------------------------|----------------------|
| pJag85  | EYFP-C1         | ECFP                                          | Kanamycin            |
|         |                 | mCerulean (aquired plasmid)                   |                      |
| pJag724 | EYFP-C1         | mTFP                                          | Kanamycin            |
|         | pmTurquoise2-C1 | mTurquoise2 (aquired plasmid)                 |                      |
| pJag410 | EYFP-C1         | mKeima                                        | Kanamycin            |
|         | pLSSmKate2 c1   | LssmKate2 (aquired plasmid)                   |                      |
| pJag813 | pcDNA3.1-       | hmKeima4.15                                   | Ampicillin           |
| pJag812 | pcDNA3.1-       | hmKeima8.5                                    | Ampicillin           |
|         |                 |                                               |                      |
| pJag830 | pcDNA3.1-       | TFP                                           | Ampicillin           |
| pJag838 | pcDNA3.1-       | TFP-(GGGS)2-TFP                               | Ampicillin           |
|         |                 |                                               |                      |
| pJag798 | pcDNA3.1-       | TFP-P2A-TFP                                   | Ampicillin           |
| pJag800 | pcDNA3.1-       | TFP-(GGGS)2-FKBP12-P2A-TFP-(GGGS)2-FRB        | Ampicillin           |
| pJag833 | pcDNA3.1-       | FKBP12-(GGGS)2-hmKeima8.5                     | Ampicillin           |
|         |                 |                                               |                      |
| pJag824 | pcDNA3.1-       | TFP-(GGGS)2-hmKeima8.5                        | Ampicillin           |
| pJag840 | pcDNA3.1-       | TFP-P2A-hmKeima8.5                            | Ampicillin           |
|         |                 |                                               |                      |
| pJag850 | pcDNA3.1-       | hmKeima8.5-(GGGS)2-FKBP12-P2A-TFP-(GGGS)2-FRB | Ampicillin           |

**Table S4. PCR Oligonucleotides for DNA construction:**

| Plasmids                                            | Fragments                  | Primers                                                            |
|-----------------------------------------------------|----------------------------|--------------------------------------------------------------------|
| TFP-pcDNA                                           | NheI-TFP-HindIII           | Forward: 5'-ATAATAGCTAGCGCTGCCACCATGGTGAGCAAGGGCGAGGAG-3'          |
|                                                     |                            | Reverse: 5'-TATTATAAGCTTTTACTTGTACAGCTCGTCCATGCC-3'                |
| hmKeima8.5-pcDNA                                    | NheI-hmKeima8.5-HindIII    | Forward: 5'-ATAATA GCTAGCGCTGCCACCATGGTGAGCGTGATCGCCGAG-3'         |
|                                                     |                            | Reverse: 5'-TATTATAAGCTTTAGCCCAGCAGGGGGTG-3'                       |
| TFP-(GGGS)2-TFP-pcDNA                               | NheI-TFP-(GGGS)2           | Forward: 5'-ATAATAGCTAGCGCTGCCACCATGGTGAGCAAGGGCGAGGAG-3'          |
|                                                     |                            | Reverse: 5'-ACTTCCACCGCCGCTGCCACCTCCCTTGTACAGCTCGTCCATGCC-3'       |
|                                                     | (GGGS)2-TFP-HindIII        | Forward: 5'-GGAGGTGGCAGCGGCGGTGGAAGTGTGAGCAAGGGCGAGGAG-3'          |
|                                                     |                            | Reverse: 5'-TATTATAAGCTTTTACTTGTACAGCTCGTCCATGCC-3'                |
| TFP-P2A-TFP-pcDNA                                   | NheI-TFP-EcoR1             | Forward: 5'-ATAATAGCTAGCGCTGCCACCATGGTGAGCAAGGGCGAGGAG-3'          |
|                                                     |                            | Reverse: 5'-TATTATGAATTCCTTGTACAGCTCGTCCATGCC-3'                   |
|                                                     | BamHI-TFP-HindIII          | Forward: 5'-ATAATA G'GATCCAGTGAGCAAGGGCGAGGAG-3'                   |
|                                                     |                            | Reverse: 5'-TATTATAAGCTTTTACTTGTACAGCTCGTCCATGCC-3'                |
| TFP-(GGGS)2-FKBP12-P2A-TFP-(GGGS)2-FRB-pcDNA        | NheI-TFP-(GGGS)2           | Forward: 5'-ATAATAGCTAGCGCTGCCACCATGGTGAGCAAGGGCGAGGAG-3'          |
|                                                     |                            | Reverse: 5'-ACTTCCACCGCCGCTGCCACCTCCCTTGTACAGCTCGTCCATGCC-3'       |
|                                                     | (GGGS)2-FKBP12-EcoR1       | Forward: 5'-GGAGGTGGCAGCGGCGGTGGAAGTGGAGTGCAGGTGAAAACC-3'          |
|                                                     |                            | Reverse: 5'-TATTATGAATTCCTCCAGTTTTAGAAGCTCCACATCGAA-3'             |
|                                                     | BamHI-TFP-(GGGS)2          | Forward: 5'-ATAATA G'GATCCAGTGAGCAAGGGCGAGGAG-3'                   |
|                                                     |                            | Reverse: 5'-ACTTCCACCGCCGCTGCCACCTCCCTTGTACAGCTCGTCCATGCC-3'       |
|                                                     | (GGGS)2-FRB-HindIII        | Forward: 5'-GGAGGTGGCAGCGGCGGTGGAAGTCTAGAATCCTCTGGCATGAGATG-3'     |
|                                                     |                            | Reverse: 5'-TATTATAAGCTTTTATCTAGTCTTTGAGATTCGTCGGAA -3'            |
| FKBP12-(GGGS)2-hmKeima8.5-pcDNA                     | NheI-FKBP12-(GGGS)2        | Forward: 5'-ATAATAGCTAGCGCTGCCACCATGGGAGTGCAGGTGAAAACC-3'          |
|                                                     |                            | Reverse: 5'-ACTTCCACCGCCGCTGCCACCTCCTTCCAGTTTTAGAAGCTCCACATCGAA-3' |
|                                                     | (GGGS)2-hmKeima8.5-HindIII | Forward: 5'-GGAGGTGGCAGCGGCGGTGGAAGTGTGAGCGTGATCGCCGAG -3'         |
|                                                     |                            | Reverse: 5'-TATTATAAGCTTTAGCCCAGCAGGGGGTG-3'                       |
| TFP-(GGGS)2-hmKeima8.5-pcDNA                        | NheI-TFP-(GGGS)2           | Forward: 5'-ATAATAGCTAGCGCTGCCACCATGGTGAGCAAGGGCGAGGAG-3'          |
|                                                     |                            | Reverse: 5'-ACTTCCACCGCCGCTGCCACCTCCCTTGTACAGCTCGTCCATGCC-3'       |
|                                                     | (GGGS)2-hmKeima8.5-HindIII | Forward: 5'-GGAGGTGGCAGCGGCGGTGGAAGTGTGAGCGTGATCGCCGAG-3'          |
|                                                     |                            | Reverse: 5'-TATTATAAGCTTTAGCCCAGCAGGGGGTG-3'                       |
| TFP-P2A-hmKeima8.5-pcDNA                            | NheI-TFP-EcoR1             | Forward: 5'-ATAATAGCTAGCGCTGCCACCATGGTGAGCAAGGGCGAGGAG-3'          |
|                                                     |                            | Reverse: 5'-TATTATGAATTCCTTGTACAGCTCGTCCATGCC-3'                   |
|                                                     | BamHI-hmKeima8.5-HindIII   | Forward: 5'-ATAATA G'GATCCAGTGAGCGTGATCGCCGAG-3'                   |
|                                                     |                            | Reverse: 5'-TATTATAAGCTT TAGCCCAGCAGGGGGTG-3'                      |
| hmKeima8.5-(GGGS)2-FKBP12-P2A-TFP-(GGGS)2-FRB-pcDNA | NheI-hmKeima8.5-(GGGS)2    | Forward: 5'-ATAATAGCTAGCGCTGCCACCATGGTGAGCGTGATCGCCGAG-3'          |
|                                                     |                            | Reverse: 5'-ACTTCCACCGCCGCTGCCACCTCCGCCAGCAGGGGGTG-3'              |
|                                                     | (GGGS)2-FKBP12-EcoR1       | Forward: 5'-GGAGGTGGCAGCGGCGGTGGAAGTGGAGTGCAGGTGAAAACC-3'          |
|                                                     |                            | Reverse: 5'-TATTATGAATTCCTCCAGTTTTAGAAGCTCCACATCGAA-3'             |
|                                                     | BamHI-TFP-(GGGS)2          | Forward: 5'-ATAATA G'GATCCAGTGAGCAAGGGCGAGGAG-3'                   |
|                                                     |                            | Reverse: 5'-ACTTCCACCGCCGCTGCCACCTCCCTTGTACAGCTCGTCCATGCC-3'       |
|                                                     | (GGGS)2-FRB-HindIII        | Forward: 5'-GGAGGTGGCAGCGGCGGTGGAAGTCTAGAATCCTCTGGCATGAGATG-3'     |
|                                                     |                            | Reverse: 5'-TATTATAAGCTTTTATCTAGTCTTTGAGATTCGTCGGAA-3'             |

## Drug Synthesis Methods

MAZ1258 and MAZ1889 were synthesized as reported previously (Keenan, T.; Yaeger, D. R.; Courage, N. L.; Rollins, C. T.; Pavone, M. E.; Rivera, V. M.; Yang, W.; Guo, T.; Amara, J. F.; Clackson, T.; et al. Synthesis and Activity of Bivalent FKBP12 Ligands for the Regulated Dimerization of Proteins. *Bioorg. Med. Chem.* **1998**, *6*, 1309–1335).

SAS121 was synthesized following the same synthetic strategy with minor modifications. Briefly, MAZ1258 was treated with trifluoroacetic acid to yield the free carboxylic acid and coupled with excess 2,2'-(ethylenedioxy)-bis(ethylamine) to afford the amine functionalized intermediate MAZ1266. MAZ1266 was coupled with Coumarin 343 using PyBOP and purified via reverse phase Flash Chromatography (Biotage, 12 g C18 column; linear gradient of 5–100% MeCN/H<sub>2</sub>O) to yield the desired product.

**Figure S1.** Experimental procedures for the synthesis

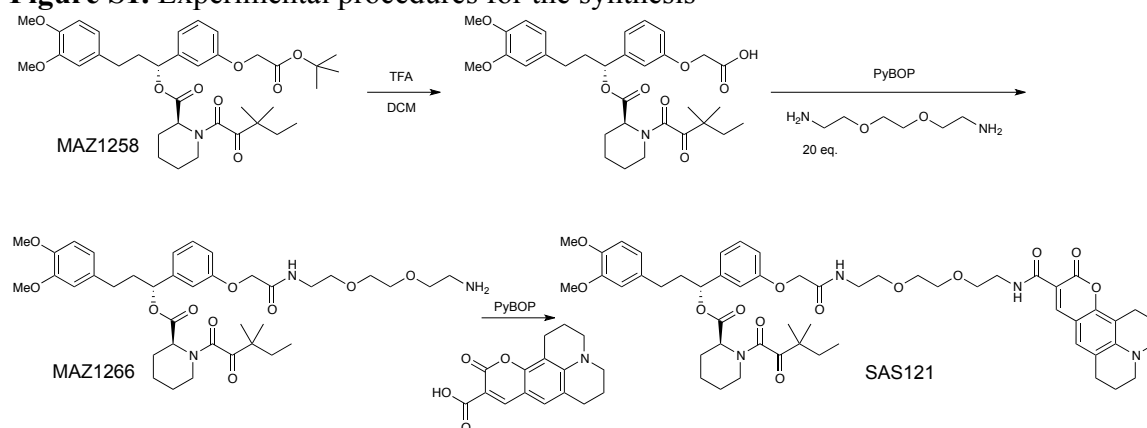

## Brightness Comparison in vivo and in vitro

**Figure S2.** The brightness ratio between hmKeima variants in ptk cells and cell lysate were compared. hmKeima4.15 and hmKeima8.5 are brighter than hmKeima in vivo than in vitro. The unexpected decrease of brightness in vitro is related to the change in pH (Violot S, Carpentier P, Blanchoin L, Bourgeois D. Reverse pH-dependence of chromophore protonation explains the large Stokes shift of the red fluorescent protein mKeima. *J Am Chem Soc.* 2009 Aug 5;131(30):10356-7).

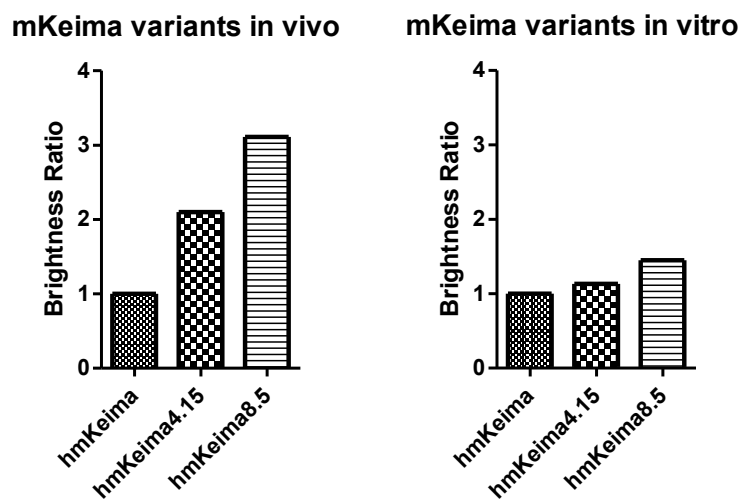

## pKa-value of mKeima and variants

Figure S3. pKa-value of mKeima and variants

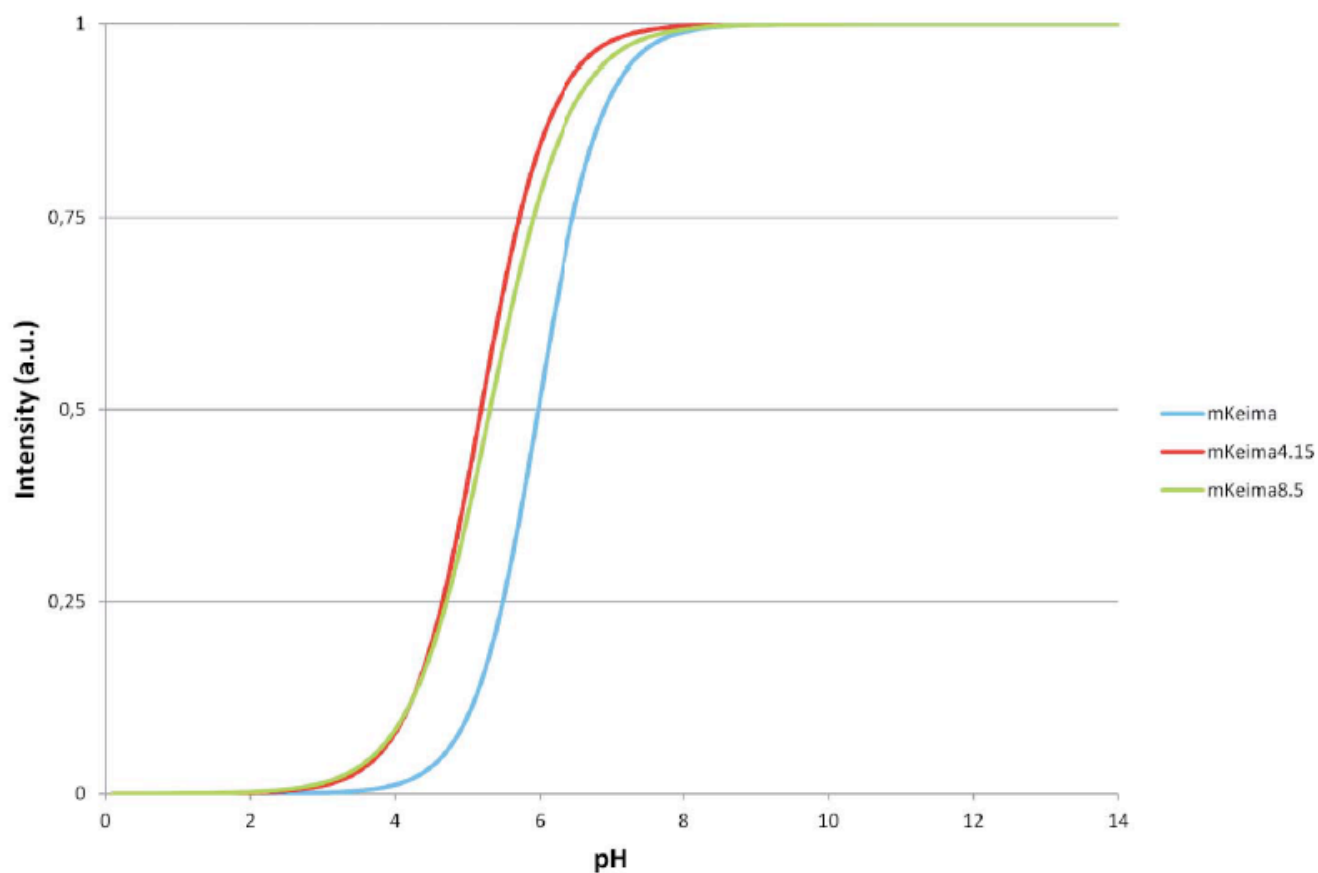

## TFP Brightness Comparison in vivo and in vitro

Figure S4. The brightness ratio of mTFP1 and mTFP1-(GGGS)<sub>2</sub>-mTFP1 in ptk cells and cell lysate were compared. The ratio in vitro is higher than in vivo.

mTFP1-mTFP1/mTFP1

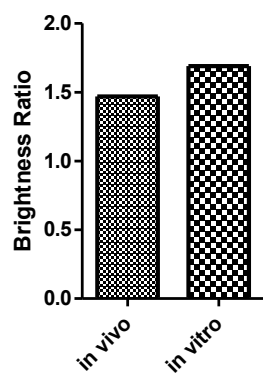



## hmKeima8.5 photophysics in living cell

**Figure S5.** The photophysics of hmKeima8.5 in living cells. (left) The diffusion coefficients measured in live cells expressed with hmKeima8.5 at four different power levels. (right) the average of normalized FCS curves of hmKeima8.5 freely intracellular diffusion at four different power levels. There are no obvious changes of the curve shape or shift of the correlation time indicating there is no anomalous photophysical property, specifically a significant dark state or triplet relaxation contribution, detectable under these laser power range which is relevant for intracellular measurements.

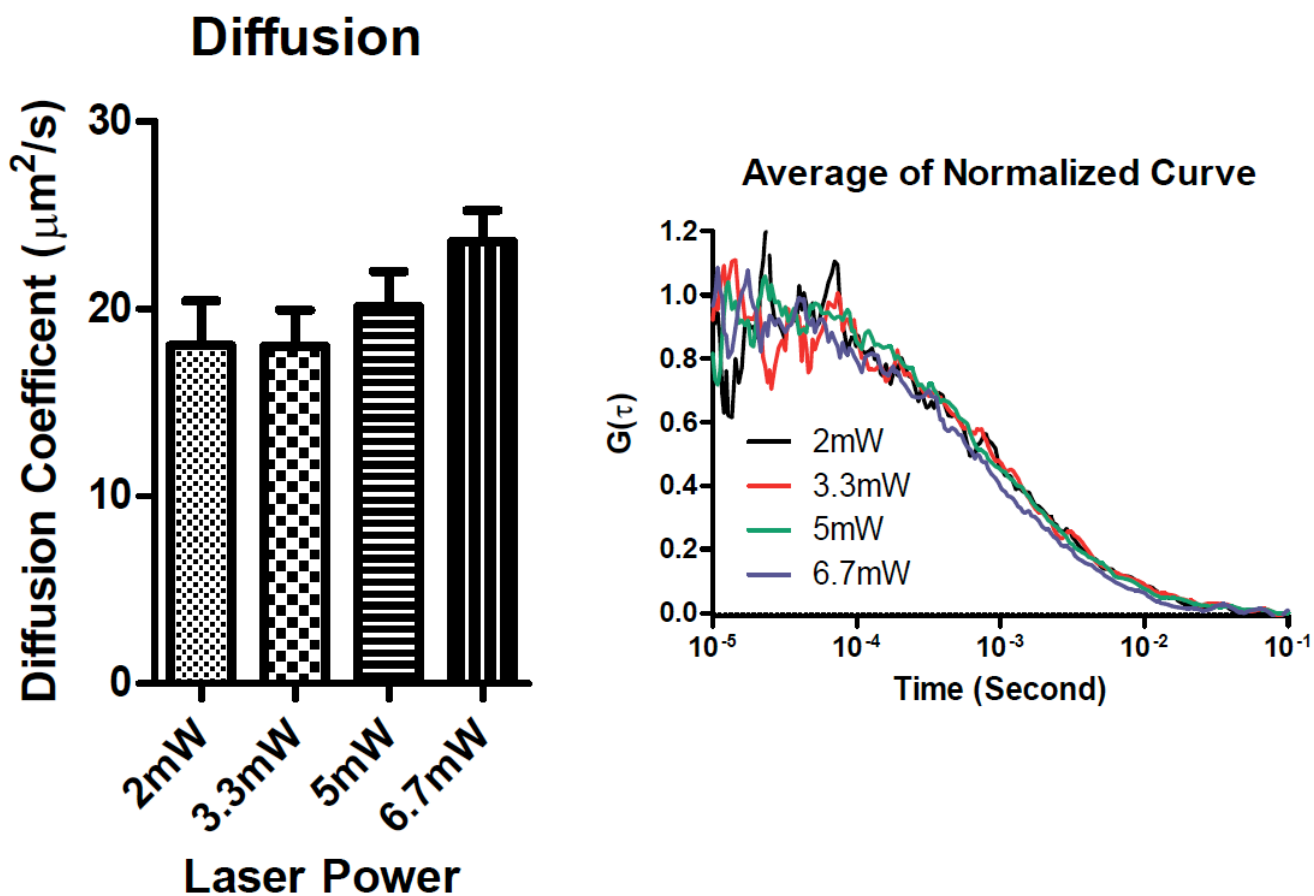

Supplement: supp_E14-10-1473v1_NewE14-10-1473CombinedSupMats.pdf [file supp_E14-10-1473v1_NewE14-10-1473CombinedSupMats.pdf]
